# Supplementary material
Source: PubMed Central journal article supplement (PMC3349829)
Supplement: mmc1.pdf [file mmc1.pdf]

Fig. S1

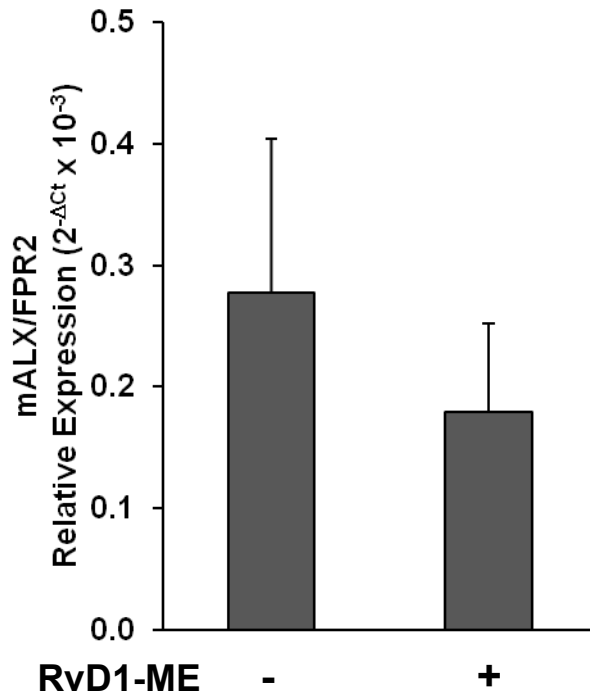

**Supplemental Figure 1. Expression of ALX/FPR2 in murine peritoneal cells.** Murine peritoneal cells were collected 24 h after initiation of peritonitis from zymosan and zymosan plus RvD1 treated mice. Real time PCR analyses were carried out as described in materials and methods. Results are mean ± SEM (n = 6 mice/group).
