# Supplementary material
Source: PubMed Central journal article supplement (PMC3349829)
Supplement: mmc2.pdf [file mmc2.pdf]

Fig S2

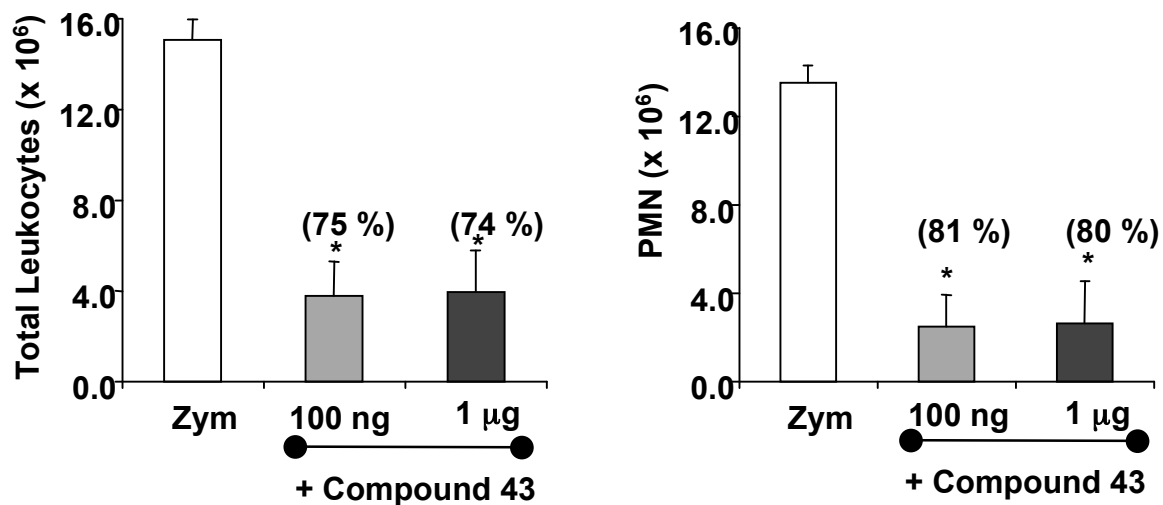

**Supplemental Figure 2. Compound 43 regulates leukocyte trafficking in murine peritonitis.** Mice were injected i.v. with Compound 43 followed by i.p. injection of 1 mg zymosan. Exudates were collected 4 h post injection and total cells enumerated using a hemocytometer. PMN numbers were determined by Ly-6G staining using flow cytometry. Results are mean  $\pm$  SEM, \*  $p < 0.05$  ( $n = 4$ ) compared to zymosan alone.
